# Supplementary material
Source: Research Square preprint supplement (doi:10.21203/rs.3.rs-9204760/v2)
Supplement: Supplementary file 1 [file 01584b956b1279a1f87ef56f.docx]

**Supplementary Table 4. Suggestions to enhance Toolkit as per participant feedback arising from interviews.**

| **Section** | **Toolkit prototype**  **Segment Headings** | **Participant feedback and supportive quotes made during interviews** | **Changes made to Toolkit post interviews** |
| --- | --- | --- | --- |
| Objectives |  | **APDs in cancer care:**  *“My thoughts here were really just maybe enhancing the language to really sort of heighten how ultimately, APDs will play a big role in influencing clinical and survivorship outcomes.”* (P23)  **Cancer survival terminology:**  *“It might be worthwhile to change that terminology from survivorship care to across the cancer care continuum to a more continuous care from across a cancer care continuum as opposed to just survivorship timeframe.”* (P23) | Added to Objectives:   - The importance of APDs in cancer care - Cancer survival terminology |
| Section 1  **Resources for describing different cancers and related treatments** | - Section outline - Bladder cancer - Blood cancer - Bone cancer - Bowel cancer - Brain cancer - Breast cancer - Gynaecological cancer - Head and neck cancer - Kidney cancer - Liver cancer - Lung cancer - Non-Hodgkin lymphoma - Oesophageal cancer - Pancreatic cancer - Prostate cancer - Skin cancer - Stomach cancer - Testicular cancer - Lymphedema secondary to cancer - Treatment types | *“And the only thing would be if you want to put in there, just say that the information offered is not just restricted to the listed cancer types that are that that it's applicable to any cancer, So in the event that someone gets this booklet [Toolkit], their cancer's not listed, they're not gonna say, oh well, OK, this is no good to me. “(*P20) | Added to section outline:   - Information offered not restricted to listed cancer types. |
| Section 2  **Nutrition Guidelines** | - Section outline - Cancer - Weight management - Nutrition support - Cancer prevention and survival | **Weight management:**  *“I noticed that the COSA position statement on malnutrition and sarcopenia isn't included in this section… There are the components of like there's the MST and the PGSGA further down which is great. They're obviously the comp key components of that guideline and that tool. I think it is really worthwhile even just to have the position statement and then maybe have the Toolkit itself linked further down.”* (P23)  *“So in terms of dietary guidelines, I think more of general balanced eating rather than impacting weight…Like it's more general, not weight specific.”* (P17)  **Nutrition support:**  *“I feel like there could be more on that [HEN]. I think that that's a real sticking point for dietitians. I feel like they, especially within this in primary care, I think they really struggle with enteral nutrition.”* (P3)  *“Yeah and see if you can find in like other states for this* [Enteral Nutrition support].*”* (P21)  *“Enteral nutrition. I think we need more, like we need more guidelines on enteral nutrition.”* (P3) | Additions to segment:  **Weight management:**   - Evidence based practice guidelines for the nutritional management of cancer cachexia - Cancer-related malnutrition and sarcopenia (COSA position statement) - Cancer-related malnutrition and sarcopenia implementation toolkit (COSA)   Removed from Weight management:   - Australian Dietary Guidelines   **Nutrition support:**  Changed heading from Home Enteral support to Nutrition support.  Added to segment:   - ESPEN guideline on home enteral nutrition - Nutrition support for adults: oral nutrition support, enteral tube feeding and parenteral nutrition (Clinical guideline) - Home Enteral Nutrition details for all states (Cardinal Health) - A narrative review of Home Enteral Nutrition in Australia with a focus on blended tube feeding (Research paper) |
| Section 3  **Resources for managing nutrition after a cancer diagnosis** | - Section outline - Healthy eating for cancer survivors - Healthy eating during treatment - Healthy eating after treatment - Reducing cancer risk - Alcohol - Protein - Immune function - Radiotherapy - Weight - Lymphedema - Malnutrition and sarcopenia - Fertility - Tube feeding and ONS - Stoma - Cultural considerations for Aboriginal and Torres Strait Islander peoples - Fact sheets in languages other than English - Recipes - Culturally diverse recipes | **Alcohol:**  *“Do we have anything Australian based for alcohol?”* (P2)  **Immune function:**  *“…one of the other sections that could be in here…a chemo diet where you shouldn't eat, salads and sandwiches bought from a [fuel station] and soft cheese and oysters. So, something like that.”* (P6)  **Fertility:**  *“Fertility is definitely an important one and I think something that's coming. Becoming more prominent.”* (P2)  **Meal services:**  *“I just thought it would be nice to put in a sort of a resource section for food preparation. Perhaps those services for clients who can't prepare their food well or have a couple of food insecurities depending on their cancer type of course... like Meals on Wheels, Light and Easy. It'll be nice to know a little bit of details about them...helpful if any of the community dietitians encounter clients who are finding difficult to get nutrition or access to food.”* (P22)  **Cultural considerations for Aboriginal and Torres Strait Islander peoples:**  *“There was like another website that a colleague recommended to me, so that could potentially be listed as well. [Our Mob and Cancer].”* (P5)  *“Mental health, like, you know, Lifeline 113 Yarn, which is the Aboriginal mental health.”* (P6)  *“Another fantastic resource is Our Mob and Cancer. It's an Australian government resource.”* (P14)  *“Are there any recipes for Aboriginal specific diets or that kind of eating?”* (P12)  **Recipes and diet:**  *“Some recipes might be quite nice… for fibre.”* (P9)  *“I mean, could you do a section on high energy, high protein recipe?”* (P3)  *“Yeah. Or even just Mediterranean and having more, yeah.”* (P17) | Additions to segments:  **Reducing cancer risk:**   - Cancer Causes and Prevention (Cancer Council Australia) - Reduce your cancer risk in 2026 (Peter Mac)   **Alcohol:**   - Limit alcohol (Cancer Council) - Alcohol and cancer risk tool (Cancer Institute NSW)   **Immune function:**   - Lowered immunity (Cancer Council NSW)   **Fertility:**   - Fertility preservation for people with cancer (eviQ)   **Meal services:**   - TLC Meals - Meals on Wheels - Marley Spoon - Hello Fresh   **Cultural considerations for Aboriginal and Torres Strait Islander peoples:**   - Optimal care pathway for Aboriginal and Torres Strait Islander people with cancer - Our Mob and Cancer - 13YARN for mental health   **Recipes and diet:**   - High protein, high energy recipes (NEMO) - Delicious high-fibre recipes (Cancer Council) - Low fibre (Bowel Cancer Australia) - The best of the Mediterranean diet (Cook for your life, USA) - Association of protein intake with recurrence and survival following primary treatment of ovarian cancer (Research paper) |
| Section 4  **Resources for nutrition impact symptoms** | - Section outline - Taste and smell - Constipation - Diarrhoea - Mouth and throat - Nausea and vomiting - Poor appetite and weight loss - Cancer related fatigue | **Constipation and diarrhoea:**  *“Are there any other constipation resources or is that it?”* (P3)  **Mouth and throat:**  *“I think referencing sort of a little bit more, distinctly for issues like with swallowing or saliva changes.”* (P23)  *“Does the taste ones also consider the metallic tastes that change the changing in that metallic tasting cause the medication reactions?”* (P2) | Alphabetised headings for clarity.  Additions to segments:  **Constipation:**   - Constipation (Cancer Council) - Managing constipation in adults with cancer (Research paper)   **Diarrhoea:**   - Diarrhoea (Cancer Council)   **Mouth and throat:**   - Mouth health and cancer treatment (Cancer Council)   **Cancer related fatigue:**   - Understanding fatigue and cancer (Cancer Council) |
| Section 5  **Resources to facilitate a consultation** | - Section outline - Malnutrition screening tools - Cancer-related malnutrition and sarcopenia tools - Nutrition support tool - Online calculators for nutritional requirements - Side effects of medication - Side effects of radiotherapy - Myth busting - Support for Veterans and people with disability - Diet/Disease relationship - Drug/Nutrient interaction - Added resource that may accompany a consultation | **Reshuffle order of Diet/Disease and Drug/Nutrient:**  *“I would probably just reshuffle this part here, the diet/disease relationship, drug/nutrient interaction a bit higher and just this part about the support, the DVA and NDIS, I'll just bring them a bit lower. Yeah, just to flow on a bit better with the nutrition information and then the support.”* (P24)  **Malnutrition Screening Tools:**  *“I normally do a GLIM or an SGA, very rarely an SGA, but mostly GLIMs... Yeah, it's good, particularly because I do a fair few phone consults, so that's handy for me.”* (P12)  *“Malnutrition screening tool. I think in my organisation we use the MNA instead of the MST.”* (P22)  **DVA:**  *“…one thing that you could add to that is the DVA supplement request form.”* (P1)  **Palliative care:**  *“Does palliative care come into place? Because I do feel sometimes depending on the stage of cancer and where they're at, palliative care can be quite tricky for a dietitian to wiggle around because of the difficult conversations you have to have with people…”* (P22) | Rearranged segments:   - Diet/Disease relationship - Drug/Nutrient interaction - Side effects of radio therapy   Addition to segments:  **Malnutrition screening tools:**   - SGA malnutrition assessment training videos (NEMO) - GLIM criteria - Glim criteria for the diagnosis of malnutrition – A consensus report from the global clinical nutrition community (Research paper) - MNA   **Support for Veterans and people with disabilities:**   - DVA supplement request form   Addition to headings:  **Palliative Care:**   - Palliative care Australia |
| Section 6  **Resources to support care givers and family** | - Section outline - Resources to support cancer caregivers - Communication with caregivers and family - Difficult conversations - Conversations regarding financial challenges - Telehealth - Mental health - Information in languages other than English | *No suggested changes provided* |  |
| New section added:  No existing section for Children and Adolescents and Young Adults (AYAs)  Section 7:  **Children & AYAs** |  | **Children & adolescents and young adults:**  “*I know that there is a real void in and gap in resources for paediatric and adolescent and young adult patients…recent work and engagement I've had with AYAs in particular who really struggle to be seen and supported because there is definitely a lack of good research and literature around their unique stage of life… So, I think if there can be an additional section for adolescents and young adults and paediatric*.” (P23)  *“… recommendation chapter for something like this to be created for children? Or is there something already available?”* (P2) | Addition to section:  New section for children and AYAs  Addition to segment:   - Guidelines and position statements - General resources - Mental health - Cancer organisations for children and AYAs |
| Section 7:  **Resources for complementary and alternative medicine (CAM) and exercise** | - Section outline - Complementary and alternative medicine (CAM) | **Exercise:**  *“The exercise or the physical activity section in the CAM and exercise section… recommend changing the wording to an exercise physiologist, maybe or exercise professional…good position statement that has a lot of great information in it by ESSA [Exercise and Sport Science Australia] called Exercise and Cancer Position Statement… adding as a resource...giving it its own section. Just to make sure that it isn't … diminished by the terminology around alternative medicine.”* (P23)  **CAM:**  *“…the MSKCC website…is good to spot what others are reporting as well, gives a clinical summary too with evidence in there as well, and it gives adverse reactions.”* (P5)  *“Even just a reference to marijuana-based medication, because a lot of people will use that for pain relief and not think, oh, is it going to interact with my cancer treatment?”* (P20) | Section divided:   - Exercise - CAM   **Section 8:** **Resources for physical activity in cancer management**  Addition to headings:   - Guidelines and position statements - General information   **Section 9:** **Resources for complementary and alternative medicine**  Addition to headings:   - General information - Cannabis use |
| Section 8:  **Upskilling opportunities** | - Section outline - eviQ educational resources - Malnutrition and sarcopenia in cancer - Enteral feeding - Stoma - Fear of cancer recurrence - Paid courses | *No suggested changes provided* | *This section is now Section 10.* |
| Section 9:  **Australian cancer organisations** | - Section outline - Cancer support organisations | **Breast cancer support:**  *“The only one not listed were support groups for breast cancer.”* (P14) | *This section is now Section 11.*  Addition to segment:   - National Breast Cancer Foundation |
| **Overall changes** | | | |
| Addition of research papers to support resources (when appropriate/ available) |  | **Research papers:**  *“I think if it was a paper that had some specific recommendation or like a guideline. So sometimes in a paper they’ll have a table with guidelines, so if it was something like that, that I would, I would refer to that.”* (P17)  *“And also, like patients actually love that as well. We so commonly get asked was there any literature like is there some papers on this that I can sort of look at? It's definitely not always consumer friendly, but it is something that I think does actually - can actually - could actually support both APDS and consumers or patients...”* (P23) | **Section 2:**   - A narrative review of Home Enteral Nutrition in Australia with a focus on blended tube feeding   **Section 3:**   - Association of protein intake with recurrence and survival following primary treatment of ovarian cancer   **Section 4:**   - Managing constipation in adults with cancer   **Section 5:**   - Glim criteria for the diagnosis of malnutrition – A consensus report from the global clinical nutrition community |
| **CHANGES NOT ACTIONED** | | | |
| Section 1 - Cancer nomenclature |  | Include the medical terminology for cancer | - Deemed too confusing |
| Interactive figures in showing where the cancers are on the human body | - Beyond scope of this study |
| A table depicting each cancer and their NIS | - Addressed in each section |
| Section 2 |  | Comparison guide for malnutrition tools | - Updated version not available |
| Section 3 |  | Recipes in different languages | - Beyond the scope of this study |
| All sections |  | Make it disability accessible (Vision impaired, hearing impaired)  A description of what each link contains next to the link | - Beyond the scope of this study |
| Add up the number of minutes/hours it would take to read the sections including all the links | - Beyond the scope of this study |
| A description of what each link contains next to the link | - Duplication as link is description |
| Translating the Toolkit and Checklist into multiple different languages | - Beyond the scope of this study |
