# Supplementary material
Source: Research Square preprint supplement (doi:10.21203/rs.3.rs-9204760/v2)
Supplement: Supplementary file 2 [file 203ce2f683c3fd766e867153.docx]

**Supplementary Table 3. Interview protocol following the think-aloud method to explore stakeholder impressions of the Toolkit and Checklist prototypes**

| **Interview Section** | **Interview Questions** |
| --- | --- |
| **Introduction**  *(Explanation of the think-aloud method)* | Please verbalise your thoughts as they occur while reviewing these resources.  There are not right or wrong answers. |
| **Task** | Participants reviewed the Toolkit and Checklist prototypes while thinking aloud. |
| **Prompts**  *(Used as needed to encourage continued verbalisation)* | What are you thinking right now?  Can you tell me more about that?  I noticed you paused, what was going through your mind?  How does that compare to what you usually do or see? |
| **Post-task questions** | Which parts were most or least useful?  Was anything missing?  Was anything confusing or unclear?  Could you see these resources being used in real life?  Is there anything else you would like to add? |
