# Supplementary material
Source: Research Square preprint supplement (doi:10.21203/rs.3.rs-9204760/v2)
Supplement: Supplementary file 3 [file 64aa8c95dccc4360451ec4a9.docx]

**Supplementary Table 5. Suggestions to enhance Checklist as per participant suggestions arising from interviews.**

| **Section** | **Checklist prototype headings** | **Participant feedback and supportive quotes made during interviews** | **Changes made to Checklist post interviews** |
| --- | --- | --- | --- |
| Section 1  **Initiation of consultation, establishing the dietitian role and addressing client expectations** | - Referral - Referred by - Client expectations - Previous dietetic advice | **Client expectations:**  *“I tend to also ask a lot about like client goals… something I would definitely ask or like to know about*.” (P17)  **Previous medical and dietetic history:**  *“I was just wondering…medications in addition to treatment.” (P5)*  *“Just thinking like other medications.”* (P12) | Checklist items added:  **Client expectations:**   - Client goals   Changed wording:  ***Previous medical and dietetic history***   - Current/ongoing medications - Relevant medical history (comorbidities) |
| Section 2  **Cancer diagnosis and treatment** | - Diagnosis | **Diagnosis**  *“In the cancer diagnosis and treatment bit, there could be one before the cancer type to say pre-diagnosis. That's when I saw the nutritionist, dietitian.”* (P6)  *“I feel like I need to know the duration, the treatment cycle and stuff like that.”* (P24)  *“I think it might be good to capture cycles as well, like whether they got 6 cycles or 12 cycles [Chemo/Radiation]. So, we'll probably have an idea on how long we might have symptoms.”* (P27) | Checklist items added:  **Diagnosis:**   - Pre-treatment - Duration of treatment (timeframe) - Treatment cycle |
| Section 3  **Medical history, test results and co-morbidities** | - Names and contact for other multidisciplinary team members (if possible) - Biochemistry (lab) results – what to look out for with cancer clients | **Names and contact for other multidisciplinary team members (if possible):**  *“Might be good to leave a bit more space for other in case they do have like a psychologist, a surgeon and a few others in their team.”* (P27)  **Biochemistry (lab) results – what to look out for with cancer clients:**  *“… kidney function tests, like eGFR and stuff, like a lot of my women struggle with that just because of their treatments.”* (P5)  *“What about things like PSA? Like cancer markers, they can be useful.”* (P3)  *“You could put things like, vitamin B12, vitamin D and things like that.”* (P3) | Checklist items added:  **Names and contact for other multidisciplinary team members (if possible):**   - Psychologist - Other (e.g. haematologist, gastroenterologist)   **Biochemistry (lab) results – what to look out for with cancer clients:**   - eGFR (kidney) - Cancer markers e.g. PSA (prostate), CA125 (ovarian) - Vit B12, Folate, Vit D - Iron levels |
| Section 4  **Dietary history and Nutrition Impact Symptoms (NIS)** | - Nutrition assessment - Nutrition impact factors - Other symptoms - Red flags | **Nutrition assessment:**  *“The MST, the malnutrition screening tool. Why isn't it under the assessment? Because that looks like to me it's an intervention stage already. So, it's like things that I should go through with patient instead of like still doing assessment at this stage.”* (P21)  **Nutrition impact factors:**  *“Sometimes they'll have more of that water weight, but they're actually just losing lots of muscle mass. You want a dry weight.”* (P2)  *“Dentures as well is something that I always look at too, and the fit of the dentures… can give you an indication of weight loss as well.”* (P3)  *“I always look for oral thrush as well.”* (P3)  **Other symptoms:**  *“I wonder if oedema should be in other symptoms as well.”* (P2)  *“What about like heartburn and reflux?”* (P3)  *“Epigastric pain as well.”* (P3)  *“Even as well like coughing and choking on food.”* (P3)  *“This could be an area where you could have sarcopenia as a loss of strength, as other symptoms.”* (P23)  **Red flags:**  *“So, we've got the nutrition impact factors and then we've got red flags. Is there a reason why? How do I word it? Like maybe they are red flags anyway?”* (P12) | Checklist items added:  **Nutrition assessment:**   - Weight history   **Nutrition impact factors:**   - Changes in the mouth - dentition - Oral thrush - Sarcopenia   **Other symptoms:**   - Oedema - Heartburn/acid reflux - Epigastric pain - Coughing (risk of aspiration)   Relocated:  **Section 5**:   - Malnutrition risk assessment: BMI, MST, PG SGA, GLIM   Changed wording:  **Nutrition assessment:**   - Dietary/lifestyle modifications post cancer diagnosis - Weight changes: gain/loss (dry weight)   **Red Flags:**   - Weight changes (e.g. unintentional weight loss) - Appetite changes (e.g. feeling full quickly) - Changes in bowel movements   Removed due to overlap:   - Nausea - Swallowing changes - Vomiting - Mouth changes |
| Section 5  **Educate client on modifiable risk factors for cancer** | - Modifiable risk factors | **Modifiable risk factors:**  *“What about like exposure to toxins and things like that? Your utensils and things like that. Even cutting boards.”* (P3)  *“I was wondering if the resources could put in something around food insecurities as well, because they tend for people with recurrence, they tend to be a bit more fatigued.”* (P22) | Relocated:  **Modifiable risk factors:**   - Conduct a Malnutrition Risk Assessment – MST - Calculate BMI   Checklist items added:  **Modifiable risk factors:**   - Exposure to toxins: Indoor air quality + Plastics in cookware   **Under Diet:**   - Flag food insecurity – discuss low-cost options |
| Section 6  **Address Complementary and Alternative Medicine (CAM)** | - Types of CAM that can be encountered | **Types of CAM that can be encountered:**  *“So, I think we've left out things like, Chinese medicine.”* (P24) | Checklist items added:  **Types of CAM that can be encountered:**   - Chinese medicine |
| Section 7  **Establish realistic goals for nutrition treatment with the client (and their carer)** | - Realistic goals | **Realistic goals:**  *“Even when you want to just outline some long-term, short-term goals, if that makes sense as well.” (P3)*  *“…addition that could be handy would be to assess readiness for change and also barriers and facilitators to implementing changes.”* (P5) | **Realistic goals:**   - Changed wording from: Clarify client’s goals to Long term/ Short term goals - Assess readiness for change – barriers/facilitators |
| Section 8  **Establish a monitoring process, evaluating progress and modifying management program and goals as necessary** | - Evaluation | **After the consultation:**  *“I could recommend adding… a little tick box for resources to be sent or followed up to the patient. I like to keep a record of those as I'm going through because …all of a sudden, it gets to the end of the consultation.”* (P23)  *“You could even put a dot point like further education because I think the education changes as the journey changes for the client.” (P3)*  *“…say somebody's been referred through the GP and they're on some kind of care plan…you've got reporting requirements around that as well.”* (P3) | Checklist items added:  **After the consultation**   - Resources to be sent to client - List the recommendations made to client - Further education as client progresses - Report requirement for clients under care plan |
| Section 9  **Establish a handover protocol for referral to other healthcare professionals** | - Handover | **Handover:**  “*I was wondering if there's a way we could put in like their next of kin or someone who cares for them to be part of the consultation process, and also in the handover to make sure they fully understand the situation.”* (P22) | Checklist items added:  **Handover:**   - Consider carer to be present for handover |
| **CHANGES NOT ACTIONED** | | | |
| Section 3 |  | Reference values for biochemistry results | Reference values are generally provided with blood test results |
| All Sections |  | Make the tick boxes tickable | - Feature will depend on Cancer Council Queensland and format of final product |
