# Supplementary material
Source: Research Square preprint supplement (doi:10.21203/rs.3.rs-9204760/v2)
Supplement: Supplementary file 5 [file 962313597a9e160e070cbe9e.docx]

**Supplementary Table 2. Environmental scan methods for resource development**

| **Steps** | **Method Description** |
| --- | --- |
| **Step 1: Identification of Priority Topics** | Participant responses from the concept prioritisation survey reviewed to identify priority topics relevant to cancer nutrition care in primary care settings. Topics meeting one or both of the following criteria were selected for inclusion:   - Highly rated on Likert scale measures (e.g. “very” or “extremely important”) - Received a high number of participant votes   These topics formed the framework against which existing resources were identified and assessed. |
| **Step 2: Identification of Credible Source Organisations** | Reputable organisations likely to host relevant and evidence-based cancer and nutrition content identified through targeted searching and professional knowledge.  Eligible organisations meeting one or more of the following criteria:   - Professional dietetic or nutrition organisations - Cancer support or advocacy organisations - Government or public health departments - Peer-reviewed literature   Priority given to Australian organisations. Reputable international organisations included only where content is relevant and transferable to the Australian primary care context. |
| **Step 3: Identification and Mapping of Resources** | Websites and digital portals hosted by the identified organisations manually reviewed to locate cancer-related and nutrition-specific content corresponding to the priority topics. Relevant digital resources identified through on-site navigation and keyword searching within each platform.  Resources mapped to participant-identified topics and recorded if meeting the following inclusion criteria:   - Focused on cancer and/or cancer survivorship - Included nutrition‑related guidance, education, or practical tools - Publicly accessible - Appropriate for use by health professionals, patients, or carers - Evidence-based |
| **Step 4: Selection and Cataloguing of Resources** | Identified resources systematically catalogued for consideration in the resource prototype. Where multiple sources addressed similar content, decisions about inclusion were guided by:   - Depth or breadth of information - Presence of practical guidance or tools - Alternative interpretations of evidence or practice approaches   Preference given to resources that add value by offering complementary perspectives or additional practical insights. Redundant content excluded to maintain usability and ensure a manageable number or resources for end users. |
