# Supplementary material
Source: Research Square preprint supplement (doi:10.21203/rs.3.rs-9204760/v2)
Supplement: Supplementary file 6 [file 9c6b41cfa817f1fde9e2de2f.docx]

**Supplementary Figure 2. Bar charts depicting Online Functions and Visual Elements**
