# Supplementary material
Source: Research Square preprint supplement (doi:10.21203/rs.3.rs-9204760/v2)
Supplement: Supplementary file 8 [file e3d94ea86fc465d7ea61bcbf.docx]

**Supplementary Table 1. Virtual Workshop activities and expected duration**

| **Activity** | **Expected duration** |
| --- | --- |
| **Participant arrival**  Participants logging in – allow time for all participants to join.  One facilitator designated to manage and troubleshoot any technical difficulties. | **5 minutes** |
| **Introduction Presentation**  Slide 1 - Title slide  Slide 2 - Acknowledgement of country  Slide 3 - Housekeeping – information regarding cameras, keeping on mute when not speaking, keeping to time  Slide 4 - Introducing the research team  Slide 5 - Facilitator sharing inspiration behind the research  Slide 6 - Participants sharing their name, participant group/s and why nutrition care is important to them  Slide 7 – Research background  Slide 8 - Building on previous research  Slide 9 - Why co-design was chosen and information on the current study  Slide 10 - Importance of stakeholder contribution  Slide 11 - Workshop agenda explained | **10 minutes** |
| **Introduction to the Virtual Whiteboard**  Familiarisation to the Whiteboard through a brief word game. Participants assigned a virtual post-it note labelled with their name and invited to create as many words as possible from letters displayed within a circle. Continued until all participants report feeling comfortable typing and interacting with the post-it notes. | **10 minutes** |
| **Questions 1 and 2**  Two questions displayed on a shared Whiteboard: 1) *What type of resource do primary care dietitians need for cancer nutrition care?* and 2) *What should the resource contain?*  Each participant assigned virtual post-it notes labelled with their name beneath each question and invited to individually brainstorm and record their ideas on the post-it notes provided. | **40 minutes** |
| **Discussion**  Group discussion led by facilitators to explore participant responses in greater depth. | **10 - 15 minutes** |
| **Concluding slide**  Thank participants for their attendance and outline the next steps of the study. | **2 minutes** |
| **Total time** | **Approx: 90 minutes** |
