# Supplementary material
Source: Research Square preprint supplement (doi:10.21203/rs.3.rs-9204760/v2)

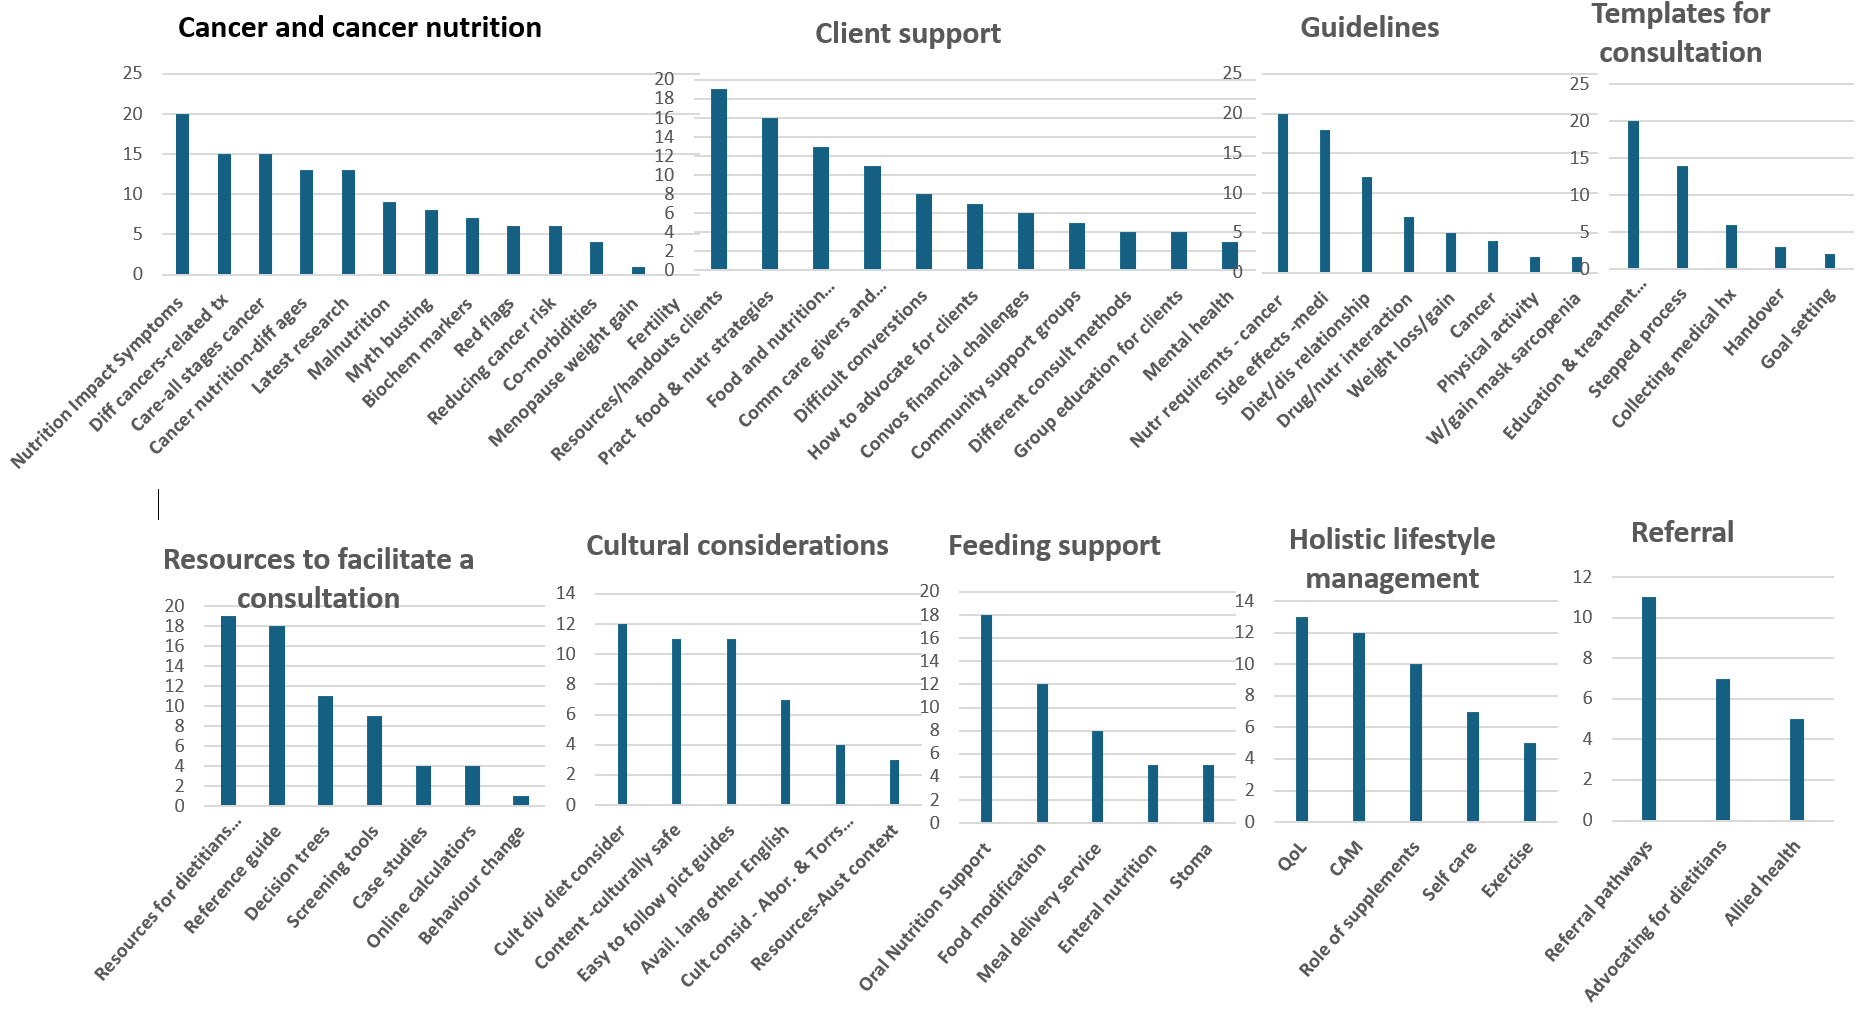
**Supplementary Figure 1. Bar graphs depicting survey results for content subcategories**

Supplement: Supplementary file 4 [file 8a796368c65454ac72482164.docx]

**Supplementary File 1. Content Prioritisation Survey**


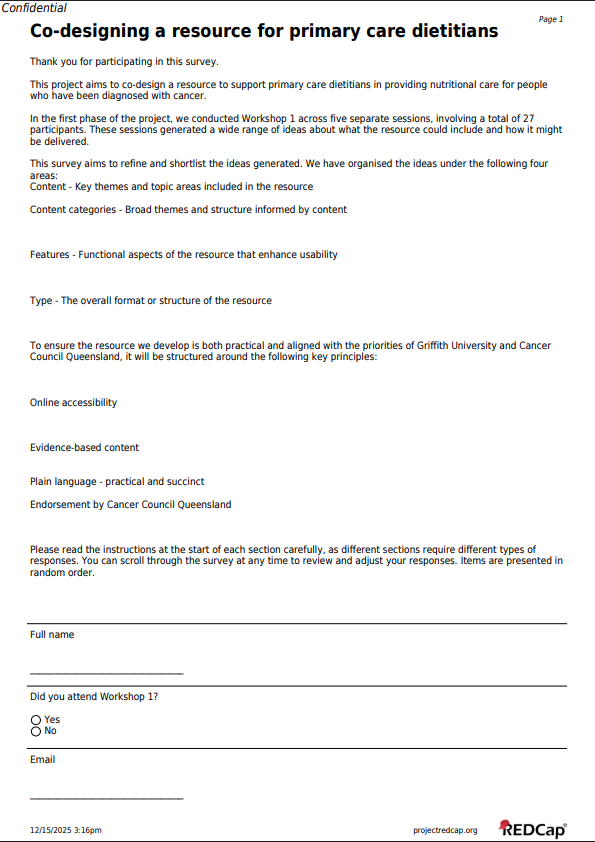


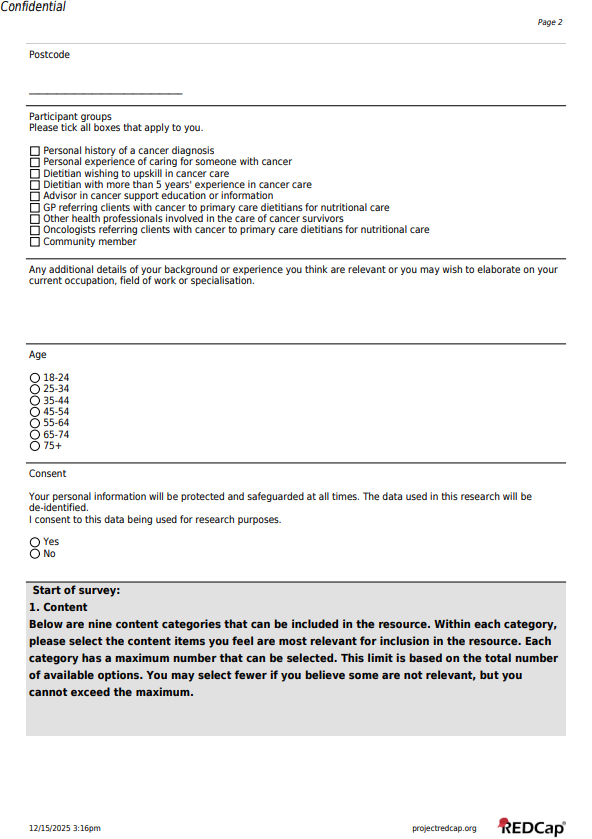


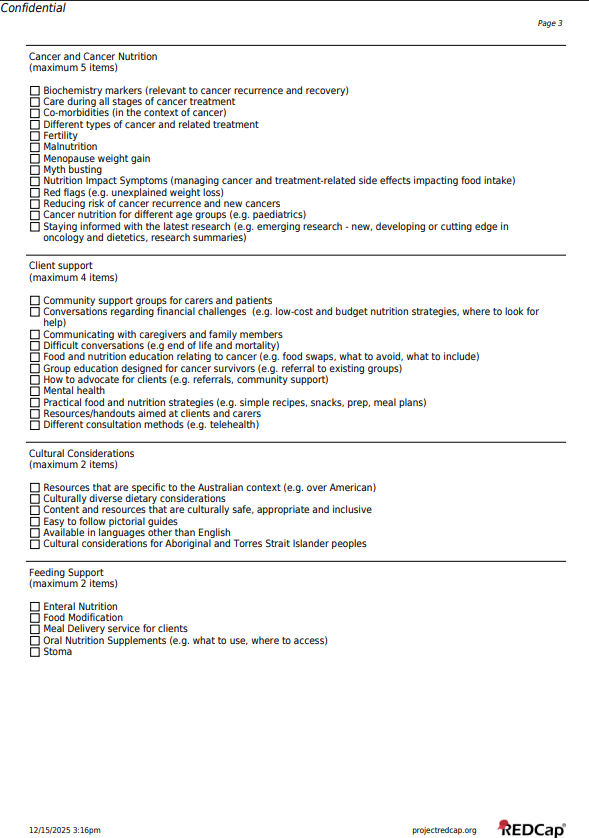


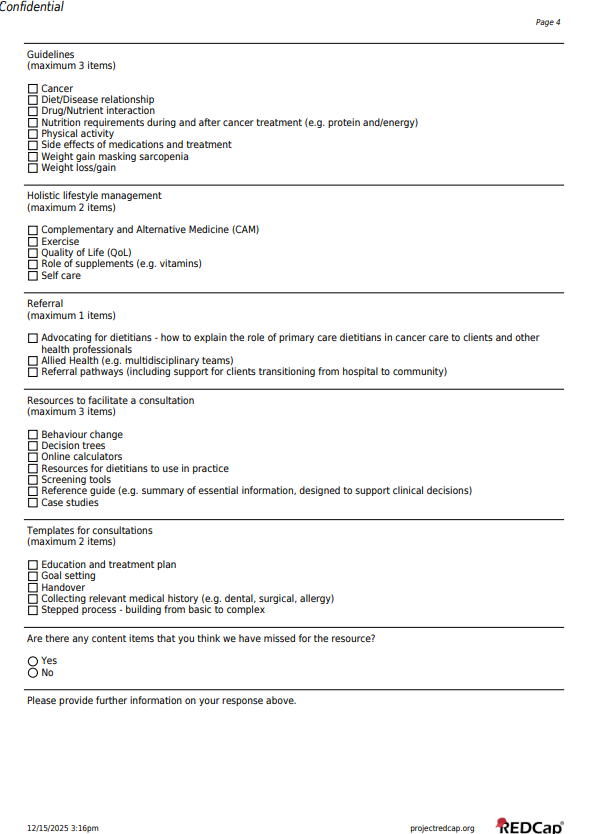


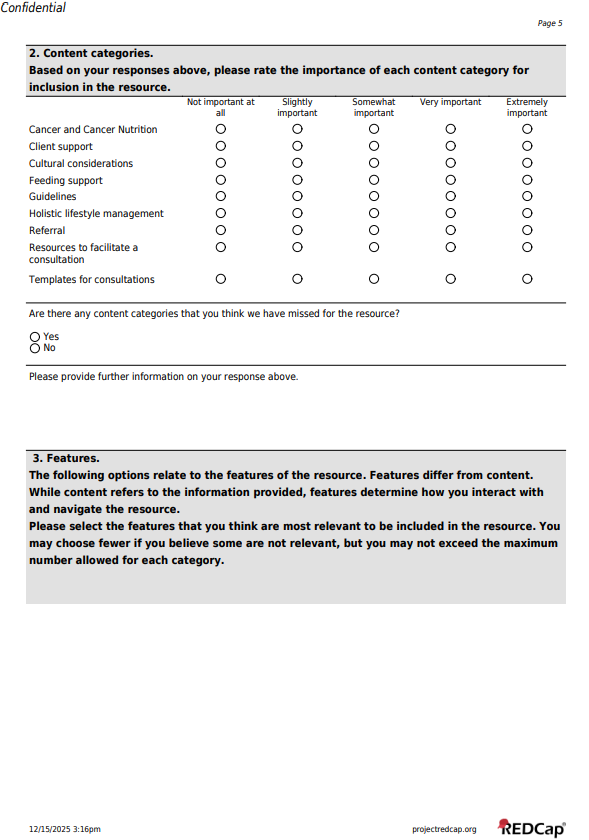


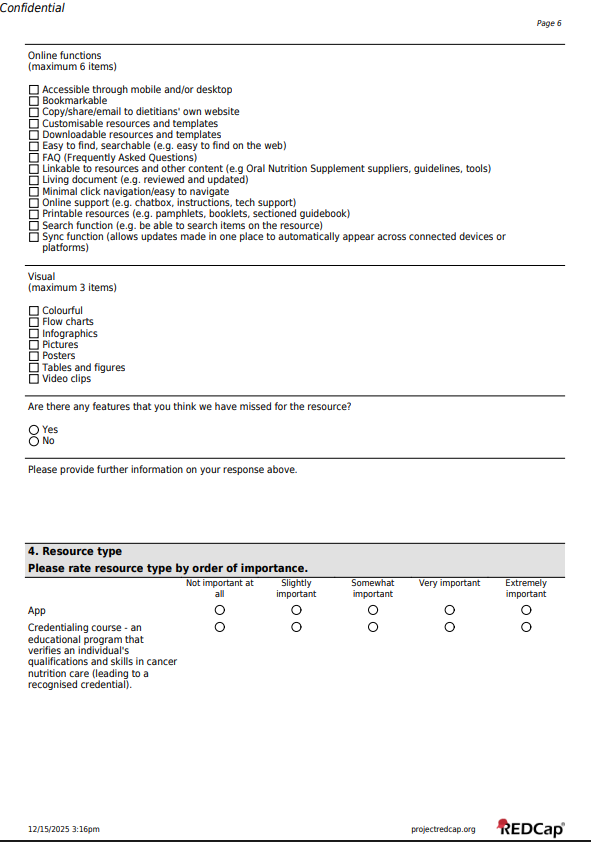


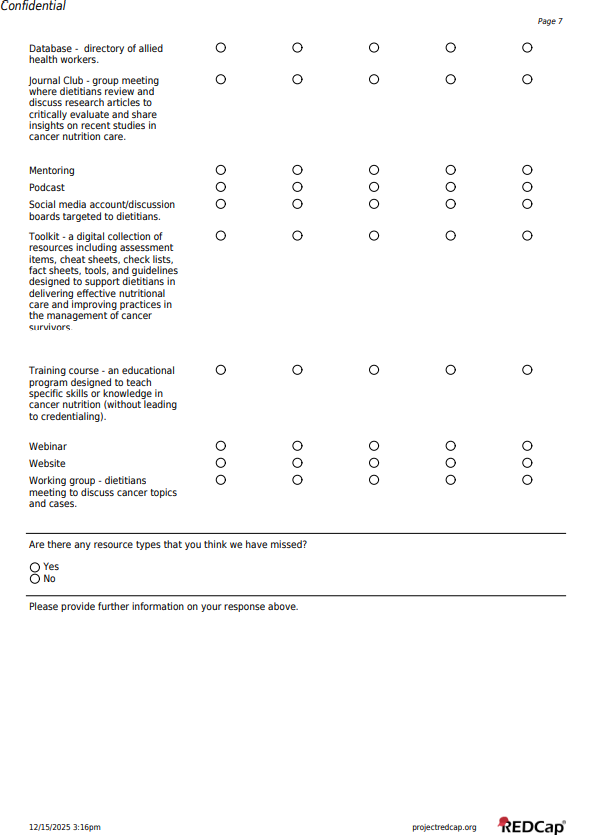


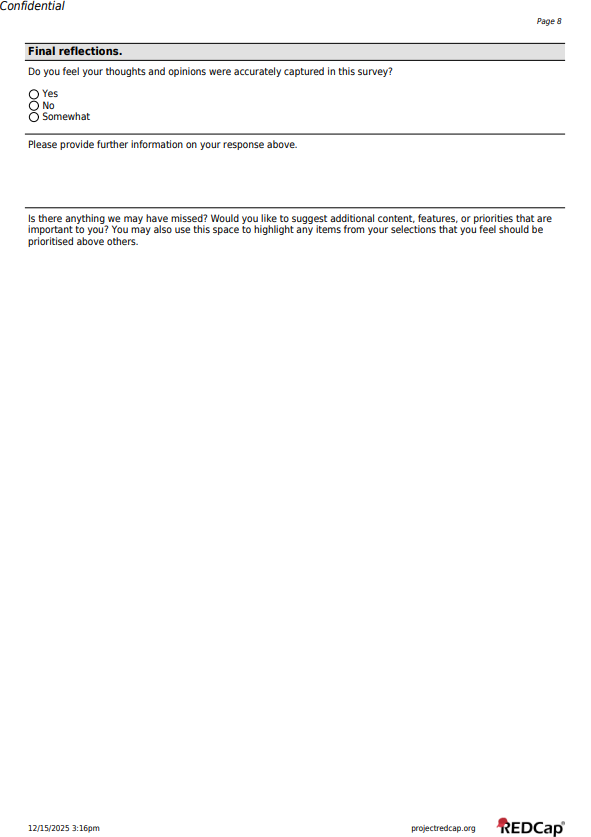

Supplement: Supplementary file 7 [file b7984985bd6545c167550322.docx]
